# Supplementary material for: Agreement between self-reported pre-pregnancy weight and measured first-trimester weight in Brazilian women
Source: PubMed Central journal article supplement (PMC7690094; doi:10.1186/s12884-020-03354-4), 2020-11-26
Supplement: 12884_2020_3354_MOESM2_ESM.pdf [file 12884_2020_3354_MOESM2_ESM.pdf]

A

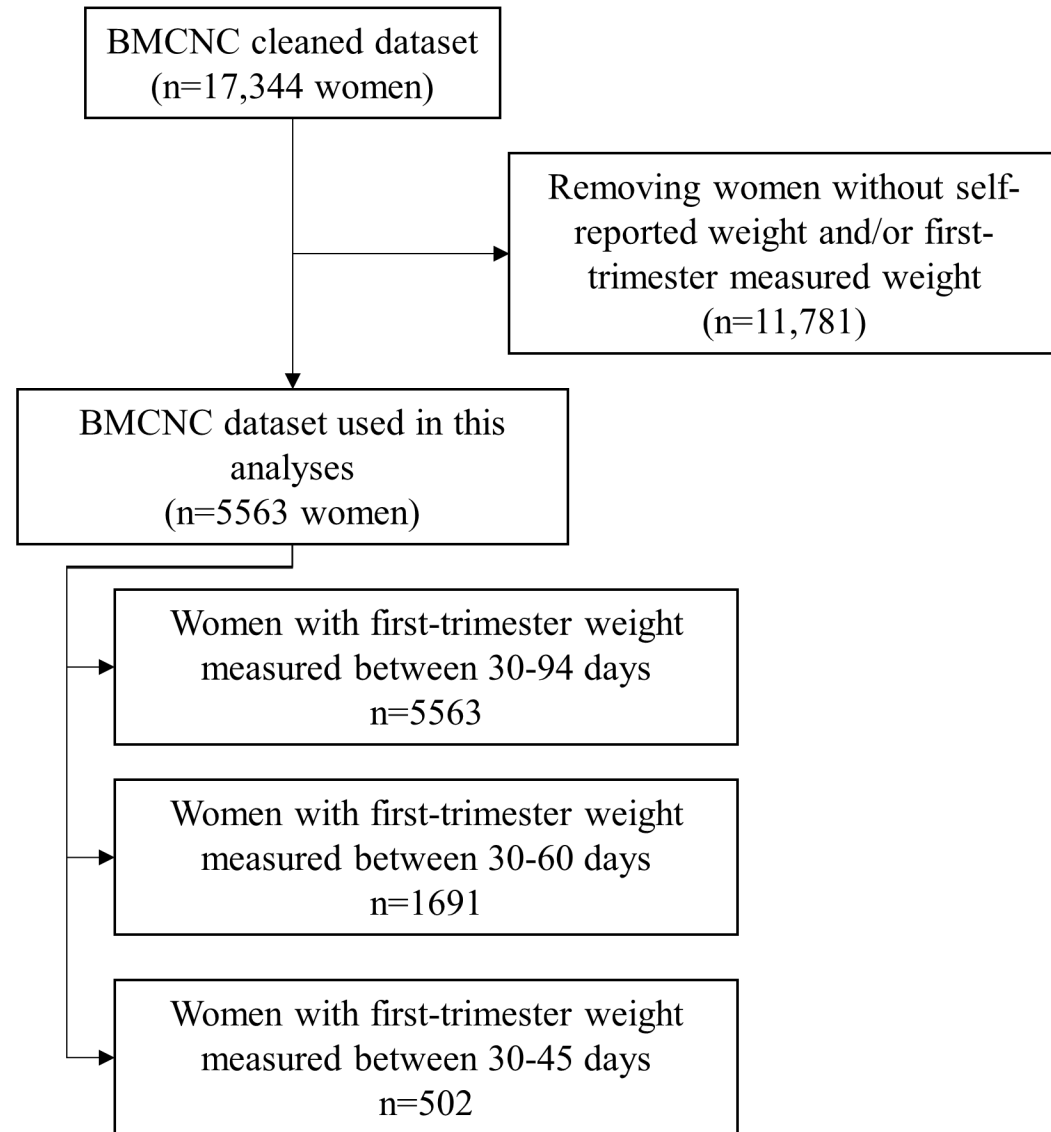

B

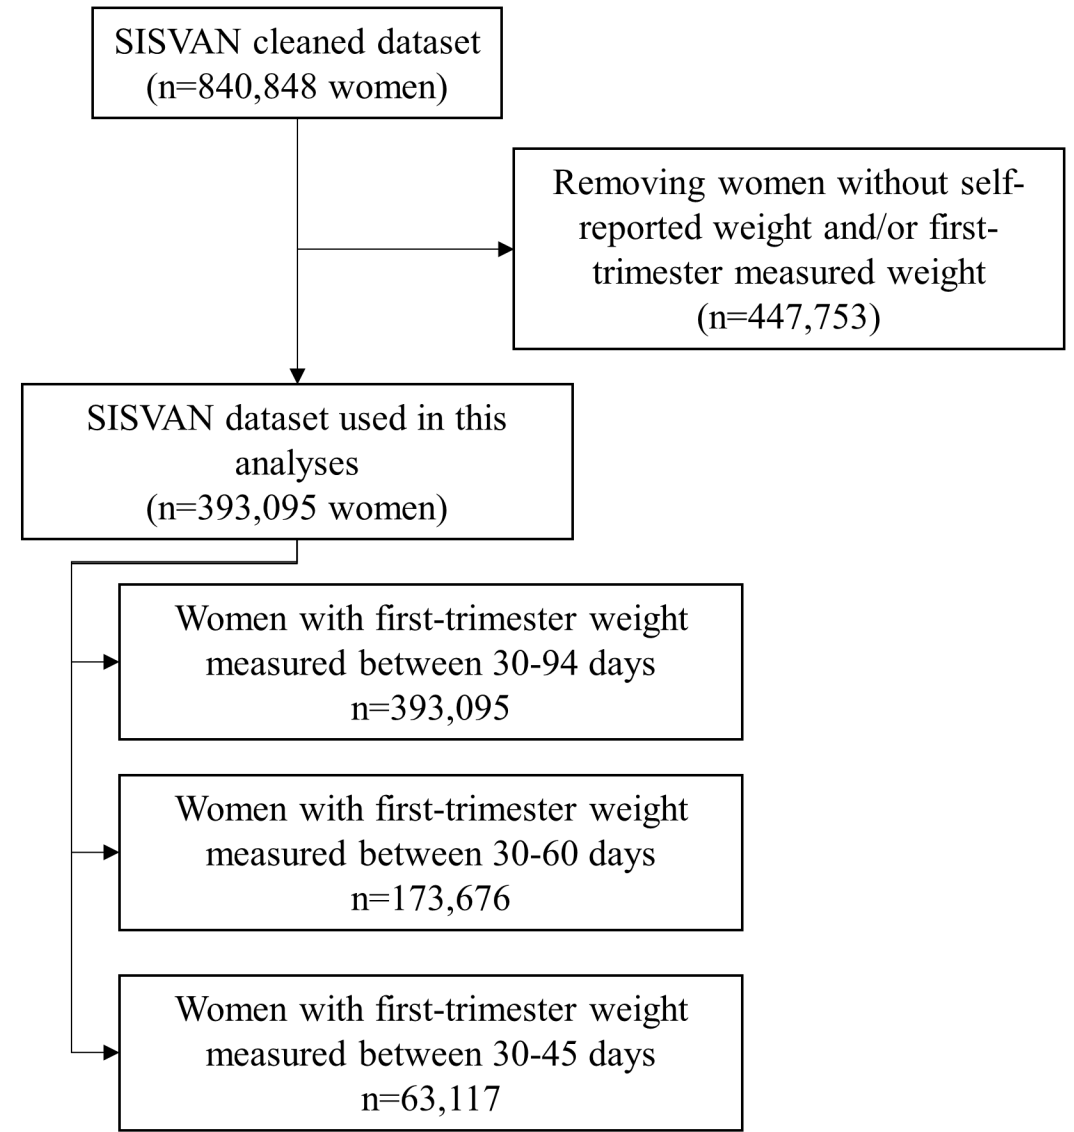

**Additional figure 1.** Flowchart for the constitution of the datasets used in this study: **a.** data from the Brazilian Maternal and Child Nutrition Consortium (BMCNC), and **b.** the National Food and Nutritional Surveillance System (SISVAN).
